# Supplementary material for: High-level artemisinin-resistance with quinine co-resistance emerges in P. falciparum malaria under in vivo artesunate pressure
Source: PubMed Central journal article supplement (PMC6166299; doi:10.1186/s12916-018-1156-x), 2018-10-01
Supplement: 12916_2018_1156_MOESM1_ESM.pdf [file 12916_2018_1156_MOESM1_ESM.pdf]

| PlasmodB Acc. No. | Annotation                                                              | Forward primer (5'→3')      | Reverse primer (5'→3')         | Amplicons Position and Length (bp)          |
|-------------------|-------------------------------------------------------------------------|-----------------------------|--------------------------------|---------------------------------------------|
| PF3D7_1343400     | DNA repair protein RAD5, putative ( <i>RAD5</i> )                       | AAGGAAGACAACGGTGACG         | TTTTTATCTGCTATTTGAGTTA         | 3250-3626 (377)                             |
| PF3D7_1417400     | Cyclic nucleotide-binding protein, putative, pseudogene ( <i>cNBP</i> ) | AAGATTTTATGGAGTTGAG         | CATTTTTGTTGATATTAGAGTTT        | 340-3717 (296)                              |
| PF3D7_1343700     | Putative kelch protein ( <i>K-13</i> )                                  | TATAGGTGGATTTGATGGTGTAG     | GTAATTA AAAAGCTGCTCCTGAACT     | 1341-1890 (550)                             |
| PF3D7_0110400     | DNA-directed RNA polymerase 2, putative ( <i>RPB9</i> )                 | ATATCTCTGAAGCCAAATGAAAAT    | ACCCAATCTCTTACTCGTCCTA         | 103-444 (341)<br><i>overlaps one intron</i> |
| PF3D7_0213400     | Protein kinase 7 ( <i>PK7</i> )                                         | TTCAATAAAGTCCAAGTA          | AAGGTTTCACATCTCTAT             | 228-526 (298)                               |
| PF3D7_1115700     | Cysteine proteinase falcipain 2a ( <i>FP2A</i> )                        | ATTGTTAGTTATTATTTTCATTATC   | AAAGTCAGCATTATTGTTGTTATT       | 105-372 (267)                               |
| PF3D7_1302100     | Gamete antigen 27/25 ( <i>Pfg27</i> )                                   | TCGCAAGAATCAAAATAGA         | TGTGGTTCATCAGGTGTTAC           | 231-638 (407)                               |
| PF3D7_0523000     | Multidrug resistance protein 1 – Region A ( <i>PfMDR1</i> )             | AGAGAAAAAAGATGGTAACCTCA     | CCGTTAATTTATGTTTGTGGT          | 17-627 (610)                                |
| PF3D7_0523000     | Multidrug resistance protein 1 – Region A ( <i>PfMDR1</i> )             | TTTGTATGTGCTGTATTATCAGG     | GCACGTTTGACTTTATGTATTAC        | 180-573 (416)                               |
| PF3D7_0523000     | Multidrug resistance protein 1 – Region B ( <i>PfMDR1</i> )             | TTTTTGCATTTAGTTCAGATGATG    | GATGTTAAACGTGTTAGTAAGTTTGCTGCT | 3014-3946 (962)                             |
| PF3D7_0523000     | Multidrug resistance protein 1 – Region B ( <i>PfMDR1</i> )             | AAAAGCTATTGATTATAAAAATAAAG  | CCCATGTTATTTAATATGTCCATATATGAA | 3138-3880 (772)                             |
| PF3D7_1303500     | Sodium/hydrogen exchanger ( <i>PfNHE</i> )                              | AGTCGAAGGCGAATCAGATG        | GATACTTACGAACATGTTTCATG        | 3734-4572 (860)                             |
| PF3D7_1303500     | Sodium/hydrogen exchanger ( <i>PfNHE</i> )                              | ATCCCTGTTGATATATCGAATG      | TTGTCATTAGTACCCTTAGTTG         | 3930-4390 (482)                             |
| PF3D7_0709000     | Chloroquine resistance transporter ( <i>PfCRT</i> )                     | ATGAAATTCGCAAGTAAAAAAAATA   | GTTTATTCCTTATTGGAAATAAAAAGGG   | 1-498 (428)                                 |
| PF3D7_0709000     | Chloroquine resistance transporter ( <i>PfCRT</i> )                     | CAAGCAAAAATGACGAGCGTTATAGAG | CAA AATTGGTAACTATAGTTTTG       | 37- 428 (414)                               |

**Additional file 1: Details of Genes, Regions and Primers Used in Genetic Sequencing of *P. falciparum* ART-R and Control Strains** Genes that were sequenced in experimental and control strains of *P. falciparum* are listed by their designated name (<http://plasmodb.org/plasmo/>). The region of each gene sequenced, the primers used, and the commonly used accepted synonym for each gene is tabulated. The amplicon position and length for each gene refers to the complementary DNA (cDNA), except for *RPB9* which refers to genomic DNA.
