# Supplementary material for: High-level artemisinin-resistance with quinine co-resistance emerges in P. falciparum malaria under in vivo artesunate pressure
Source: PubMed Central journal article supplement (PMC6166299; doi:10.1186/s12916-018-1156-x), 2018-10-01
Supplement: 12916_2018_1156_MOESM6_ESM.pdf [file 12916_2018_1156_MOESM6_ESM.pdf]

## A - Single dose Regimen

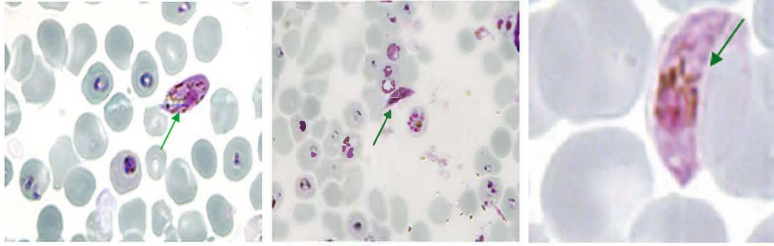

## B - Double dose Regimen

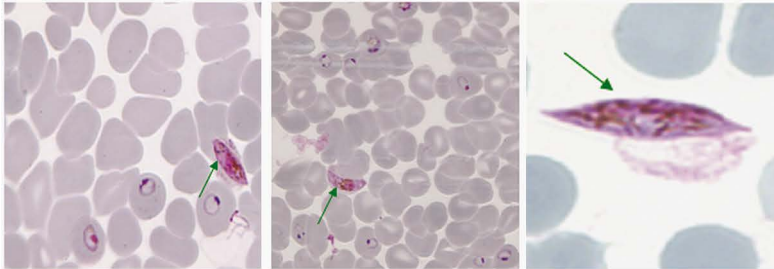

### Additional File 6: Gametocytes Developing from Artemisinin Resistant parasites

Gametocytes (green arrows) can be seen at different stages of development in thin blood smears taken from a) mice infected with single-dose resistant strains and b) mice infected with double-dose resistant strains.
