# Supplementary material for: High-level artemisinin-resistance with quinine co-resistance emerges in P. falciparum malaria under in vivo artesunate pressure
Source: PubMed Central journal article supplement (PMC6166299; doi:10.1186/s12916-018-1156-x), 2018-10-01
Supplement: 12916_2018_1156_MOESM8_ESM.pdf [file 12916_2018_1156_MOESM8_ESM.pdf]

| Dose of Artesunate per Injection (two injections given 24 hours apart) |          |          |          |           |                      |            |
|------------------------------------------------------------------------|----------|----------|----------|-----------|----------------------|------------|
| Generation                                                             | 2.4mg/kg | 4.8mg/kg | 9.6mg/kg | 19.2mg/kg | 38.4mg/kg            | 80mg/kg    |
| 1 <sup>st</sup><br>(5 mice)                                            | 2, 2     | 3, 1     | 3, 1, 1  | 2, 4      | 5                    | -          |
| 2 <sup>nd</sup><br>(8 mice)                                            | -        | -        | -        | 1         | 1, 1, 4, 2, 3,<br>5* | 1          |
| 3 <sup>rd</sup><br>(3 mice)                                            | -        | -        | -        | -         | 1, 1, 3              | -          |
| 4 <sup>th</sup><br>(4 mice)                                            | -        | -        | -        | -         | -                    | 2, 1, 3, 1 |
| Number of mice used for each dose                                      | 2        | 2        | 3        | 3         | 10                   | 5          |

**Additional File 8: Number and intensity of artesunate drug pressure cycles required to select for artemisinin-resistance using a two-day artesunate regimen**

Each digit tabulated represents a mouse at a given time in the artemisinin resistance selection process. The number indicates how many two-day regimen APCs that mouse underwent at a given drug concentration, and the colour of the digit indicates the response of parasites infecting that mouse to the last APC at that drug concentration (green=sensitive/intermediate, red=resistant). \*Includes 2 APCs at doses of 9.6 mg/kg
