# Supplementary material for: High-level artemisinin-resistance with quinine co-resistance emerges in P. falciparum malaria under in vivo artesunate pressure
Source: PubMed Central journal article supplement (PMC6166299; doi:10.1186/s12916-018-1156-x), 2018-10-01
Supplement: 12916_2018_1156_MOESM9_ESM.pdf [file 12916_2018_1156_MOESM9_ESM.pdf]

|         | Plasma Concentration of DHA (ng/mL) |                        |
|---------|-------------------------------------|------------------------|
|         | <i>1 hour post-injection</i>        | 2 hours post-injection |
| NSG 491 | 3219.3                              | 591.3                  |
| NSG 493 | 3159.8                              | 1445.5                 |
| NSG 494 | 2423.3                              | 330.3                  |
| NSG 495 | 1573.0                              | 571.3                  |

**Additional File 9: Mouse plasma dihydroartemisinin (DHA) concentrations measured after intravenous administration of artesunate**

The plasma concentrations of dihydroartemisinin (the active metabolite of artesunate) as measured in four mice infected with the ART-R<sub>120</sub> strain 1 and 2 hours after intravenous administration of artesunate (120 mg/kg) using reversed-phase liquid chromatography coupled to tandem mass spectrometry (LC-MS/MS) are shown. Follow up of mouse parasitemia in the days following drug administration showed parasite survival and hence resistance to the measured drug concentrations in all four mice.
