# Supplementary material for: High-level artemisinin-resistance with quinine co-resistance emerges in P. falciparum malaria under in vivo artesunate pressure
Source: PubMed Central journal article supplement (PMC6166299; doi:10.1186/s12916-018-1156-x), 2018-10-01
Supplement: 12916_2018_1156_MOESM10_ESM.pdf [file 12916_2018_1156_MOESM10_ESM.pdf]

| Drug          | ART-S                 | Single Dose Regimen   |                              |                       |                                    |                          |                                    | Double Dose Regimen     |                                   |                         |                                   |                          |                                    |
|---------------|-----------------------|-----------------------|------------------------------|-----------------------|------------------------------------|--------------------------|------------------------------------|-------------------------|-----------------------------------|-------------------------|-----------------------------------|--------------------------|------------------------------------|
|               |                       | ART-R <sub>30</sub>   | F; p                         | ART-R <sub>120</sub>  | F; p                               | ART-R <sub>240</sub>     | F; p                               | ART-R <sub>DD19.2</sub> | F; p                              | ART-R <sub>DD38.4</sub> | F; p                              | ART-R <sub>DD80</sub>    | F; p                               |
| Artesunate    | 10.7<br>(10.2 – 11.2) | 11.5<br>(6.6 – 16.85) | <b>0.525;</b><br><b>0.47</b> | 82.5<br>(69.5 – 95.8) | <b>191.3;</b><br><b>&lt;0.0001</b> | 100.3<br>(92.9 – 118.4)  | <b>304.8;</b><br><b>&lt;0.0001</b> | 24.0<br>(17.5 – 35.5)   | <b>31.9;</b><br><b>&lt;0.0001</b> | 59.1<br>(39.6 – 78.6)   | <b>58.3;</b><br><b>&lt;0.0001</b> | 47.7<br>(36.7 – 58.7)    | <b>147.6;</b><br><b>&lt;0.0001</b> |
| DHA           | 13.8<br>(12.9–14.6)   | -                     | -                            | 54.6<br>(51.6–57.6)   | <b>300.3;</b><br><b>&lt;0.0001</b> | 49.5<br>(42.7–57)        | <b>132;</b><br><b>&lt;0.0001</b>   | -                       | -                                 | -                       | -                                 | 30.3<br>(26.4 – 33.5)    | <b>53.6;</b><br><b>p&lt;0.0001</b> |
| Amodiaquine   | 11.3<br>(10.6 – 12.1) | -                     | -                            | -                     | -                                  | 132.4<br>(115.5–149.3)   | <b>243.7;</b><br><b>&lt;0.0001</b> | -                       | -                                 | -                       | -                                 | 51.2<br>(46.1 – 56.3)    | <b>152.5;</b><br><b>&lt;0.0001</b> |
| Mefloquine    | 41.7<br>(39.1 – 44.4) | -                     | -                            | -                     | -                                  | 39.1<br>(34.1 – 44.5)    | <b>0.82;</b><br><b>0.37</b>        | -                       | -                                 | -                       | -                                 | 41.3<br>(39.2 – 50.5)    | <b>0.021;</b><br><b>0.89</b>       |
| Chloroquine   | 50.1<br>(46.5 – 53.7) | -                     | -                            | -                     | -                                  | 53.0<br>(42.7 – 68.3)    | <b>0.39;</b><br><b>0.54</b>        | -                       | -                                 | -                       | -                                 | 52.4<br>(42.1 – 67.2)    | <b>0.346;</b><br><b>0.56</b>       |
| Quinine       | 49.7<br>(46.6 – 52.8) | -                     | -                            | -                     | -                                  | 226.9<br>(145.8 – 392.1) | <b>23.12;</b><br><b>&lt;0.0001</b> | -                       | -                                 | -                       | -                                 | 106.25<br>(93.3 – 115.6) | <b>98.9;</b><br><b>&lt;0.0001</b>  |
| Halofantrine  | 7.9<br>(7.3 – 8.6)    | -                     | -                            | -                     | -                                  | 30.4<br>(25.9 – 34.9)    | <b>159.3;</b><br><b>&lt;0.0001</b> | -                       | -                                 | -                       | -                                 | 7.9<br>(6.8 – 9.0)       | <b>0.008;</b><br><b>0.93</b>       |
| Lumefantrine  | 7.5<br>(6.3 – 8.7)    | -                     | -                            | -                     | -                                  | 7.8<br>(6.2 – 9.8)       | <b>0.13;</b><br><b>0.72</b>        | -                       | -                                 | -                       | -                                 | -                        | -                                  |
| Pyremethamine | 16.2<br>(13.8 – 18.8) | -                     | -                            | -                     | -                                  | 19.9<br>(16.5 – 24.6)    | <b>4.75;</b><br><b>0.05</b>        | -                       | -                                 | -                       | -                                 | -                        | -                                  |

**Additional file 10: *In vitro* IC<sub>50</sub> nM (95%CI) values at different stages of ART-R**

IC<sub>50</sub> (95% confidence interval) values for all drugs tested are shown for the drug-naïve progenitor strain (ART-S) and for strains that developed artemisinin resistance to increasing doses of artesunate under both the single dose regimen (ART-R<sub>30</sub>, ART-R<sub>120</sub>, ART-R<sub>240</sub>) and the double dose regimen (ART-R<sub>DD19.2</sub>, ART-R<sub>DD38.4</sub>, ART-R<sub>DD80</sub>). The probability (p) of the IC<sub>50</sub> value being calculated from the same curve obtained for the sensitive progenitor parasite is shown for each drug tested in each strain, as determined by the extra sum-of-squares F test.
