# Supplementary material for: High-level artemisinin-resistance with quinine co-resistance emerges in P. falciparum malaria under in vivo artesunate pressure
Source: PubMed Central journal article supplement (PMC6166299; doi:10.1186/s12916-018-1156-x), 2018-10-01
Supplement: 12916_2018_1156_MOESM11_ESM.pdf [file 12916_2018_1156_MOESM11_ESM.pdf]

**A**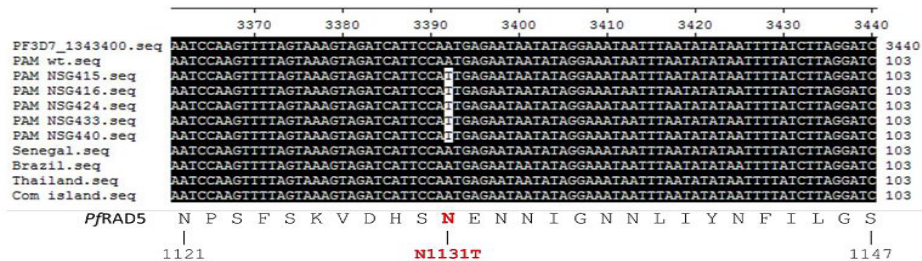**B**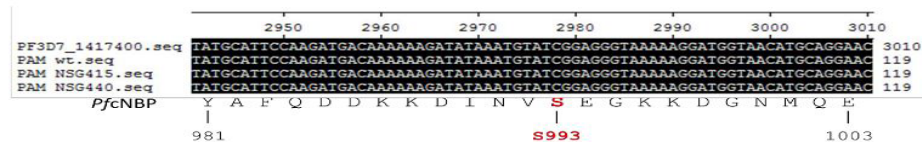**C**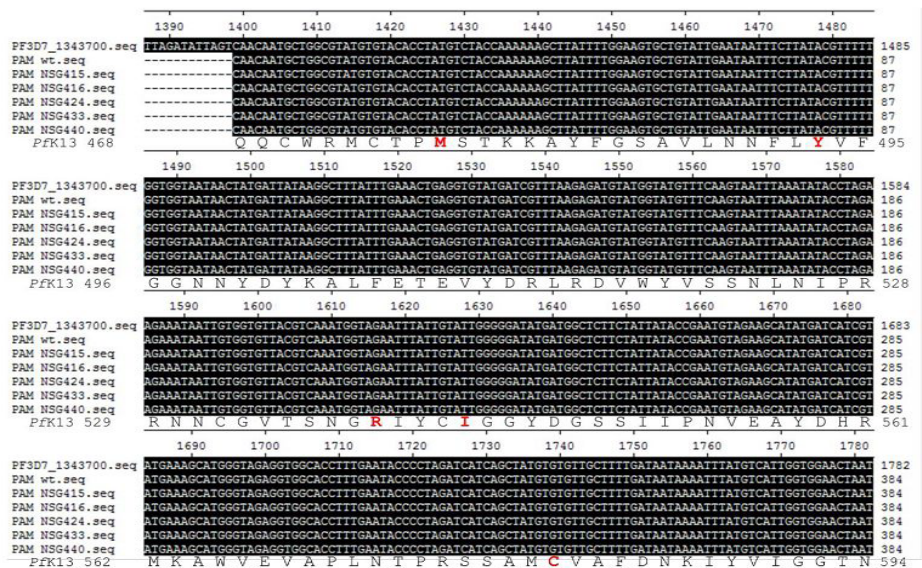**Additional File 11: Genetic Sequencing of *RAD5*, *cNBP* and *Kelch-13***

Genetic sequencing from control (307, PAM wt) and artemisinin resistant (NSG 415, 416, 424, 433 and 440) strains are aligned for comparison of regions sequenced in (A) Pf307 \_ 1343400 (*PfRAD5*) (B) PI307 \_ 1417400 (*PfcNBP*) and (C) PI3D7 \_ 1343700 (*PfKelch-13*). Amino acids affected by synonymous mutation reported by others to be associated with ART-R are highlighted in red. Additional control clinical isolates from Brazil, Comoro Islands, Senegal and Thailand are shown in (A).
