# Supplementary material for: High-level artemisinin-resistance with quinine co-resistance emerges in P. falciparum malaria under in vivo artesunate pressure
Source: Springer Nature journal article supplement (doi:10.1186/s12916-018-1156-x), 2018-09-27
Supplement: MOESM2 [file 16165312]

120 mg/Kg AS single dose

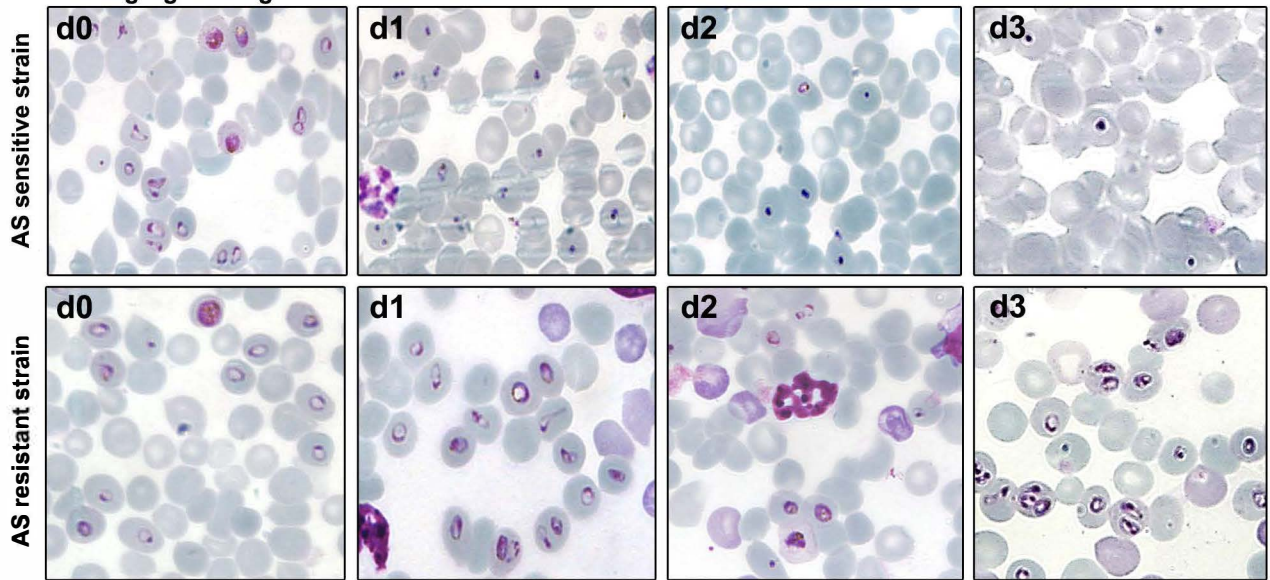

**Additional File 2: Morphological changes of ART-R parasites under treatment**

- (upper row) Thin blood smears from an NSG mouse infected with the sensitive strain are shown from the day of delivery of 120 mg/kg AS (D0), and the three following days (D1-3). Pycnotic forms can be seen (D1-3).
- (lower row) Thin blood smears from an NSG mouse infected with the ART-R<sub>120</sub> strain are shown from the day of delivery of 120 mg/kg AS (D0), and resistant parasites are seen to persist the three following days (D1-3).
