# Supplementary material for: High-level artemisinin-resistance with quinine co-resistance emerges in P. falciparum malaria under in vivo artesunate pressure
Source: Springer Nature journal article supplement (doi:10.1186/s12916-018-1156-x), 2018-09-27
Supplement: MOESM5 [file 16165312]

| Dose of Artesunate (single doses)              |               |          |            |                  |                  |         |                     |                     |
|------------------------------------------------|---------------|----------|------------|------------------|------------------|---------|---------------------|---------------------|
| Generation                                     | 2.4mg/kg      | 3.3mg/kg | 4mg/kg     | 15mg/kg          | 30mg/kg          | 60mg/kg | 120mg/kg            | 240mg/kg            |
| 1 <sup>st</sup><br>(5 mice)                    | 3, 3, 3,<br>3 | 6, 4, 2  | 1, 2       | -                | -                | -       | -                   | -                   |
| 2 <sup>nd</sup><br>(9 mice)                    | -             | 1        | 2, 1,<br>3 | 4, 9, 9,<br>6, 6 | 1, 2, 1, 2       | -       | -                   | -                   |
| 3 <sup>rd</sup><br>(6 mice)                    | -             | -        | -          | -                | 2, 4, 5,<br>3, 4 | 5*      | -                   | -                   |
| 4 <sup>th</sup><br>(1 mouse)                   | -             | -        | -          | -                | -                | 1       | 3                   | 1                   |
| 5 <sup>th</sup><br>(6 mice)                    | -             | -        | -          | -                | -                | -       | 3, 4, 2, 3          | 2, 4                |
| 6 <sup>th</sup><br>(10 mice)                   | -             | -        | -          | -                | -                | -       | 3, 2, 2, 2,<br>2, 2 | 2, 1, 1, 1,<br>2, 7 |
| 7 <sup>th</sup><br>(6 mice)                    | -             | -        | -          | -                | -                | -       | -                   | 1, 2, 1, 1,<br>1, 1 |
| <b>Number of mice injected with given dose</b> | 4             | 4        | 5          | 5                | 9                | 2       | 11                  | 15                  |

**Additional File 5: Number and intensity of artesunate drug pressure cycles required to select for artemisinin-resistance using single doses of artesunate.**

Each digit tabulated represents a mouse at a given time in the artemisinin resistance selection process. The number indicates how many single dose APCs that mouse underwent at a given drug concentration, and the color of the digit indicates the response that was produced by parasites infecting that mouse to the last APC at that drug concentration (green=sensitive/intermediate, red=resistant). \*See NSG 385 SI Fig 1
